# Supplementary material
Source: publisher figshare collection journal article supplement (https://karger.figshare.com/ndownloader/files/13525157)
Supplement: Supplementary file 1 [file 13525157]

**Supplementary Figure 1:** Taxonomic stack bars demonstrates the taxa that represent more than 1% of the bacterial composition of study groups

1. Phylum (B) Class (C) Order (D) Family (E) Genus.

Abbreviations: CR, chronic rhinitis; AR, allergic rhinitis; AS, atopic asthma.
